# Supplementary material
Source: PubMed Central journal article supplement (PMC6439575)
Supplement: jamadermatol-155-72-s001.pdf [file jamadermatol-155-72-s001.pdf]

## Supplementary Online Content

Pugh J, Khan SG, Tamura D, et al. Use of big data to estimate prevalence of defective DNA repair variants in the US population. *JAMA Dermatol*. Published online December 5, 2018. doi:10.1001/jamadermatol.2018.4473

**eTable 1.** 156 XP Disease Associated Missense or Nonsense Mutations in *XPA-G* genes from HGMD database and NIH cohort

**eTable 2.** 65 XP Mutations Listed in gnomAD Database

This supplementary material has been provided by the authors to give readers additional information about their work.

**eTable 1.** 156 XP Disease Associated Missense or Nonsense Mutations in *XPA-G* genes from HGMD database and NIH cohort

| Complement-<br>ation Group | Gene               | Amino<br>Acid<br>Number | Clinical<br>Phenotype* | Mutation<br>Frequency<br>Listed in<br>GnomAD<br>Database? | rs Number** | Protein Change | cDNA             |
|----------------------------|--------------------|-------------------------|------------------------|-----------------------------------------------------------|-------------|----------------|------------------|
| A                          | <i>XPA</i>         | 85                      | XP                     | NO                                                        | n/a***      | p.Q85X         | c. 253C>T        |
| A                          | <i>XPA</i>         | 94                      | XP                     | NO                                                        | n/a         | p.P94L         | c.281C>T         |
| A                          | <i>XPA</i>         | 95                      | XP                     | NO                                                        | n/a         | p. G95R        | c.283G>A         |
| A                          | <i>XPA</i>         | 105                     | XP                     | NO                                                        | n/a         | p.C105Y        | c. 314G>A        |
| A                          | <i>XPA</i>         | 108                     | XP                     | YES                                                       | 104894131   | p.C108F        | c.323G>T         |
| A                          | <i>XPA</i>         | 111                     | XP                     | YES                                                       | 769255883   | p.E111X        | c.331G>T         |
| A                          | <i>XPA</i>         | 116                     | XP                     | NO                                                        | 104894134   | p.Y116X        | c.348T>A         |
| A                          | <i>XPA</i>         | 126                     | XP                     | NO                                                        | n/a         | p.C126W        | c.378T>G         |
| A                          | <i>XPA</i>         | 126                     | XP                     | NO                                                        | n/a         | p.C126Y        | c.377G>A         |
| A                          | <i>XPA</i>         | 151                     | XP                     | NO                                                        | n/a         | p.K151X        | c.451A>T         |
| A                          | <i>XPA</i>         | 185                     | XP                     | NO                                                        | n/a         | p.Q185X        | c.553C>T         |
| A                          | <i>XPA</i>         | 207                     | XP                     | YES                                                       | 104894133   | p.R207X        | c.619C>T         |
| A                          | <i>XPA</i>         | 208                     | XP                     | NO                                                        | n/a         | p.Q208X        | c.622C>T         |
| A                          | <i>XPA</i>         | 211                     | XP                     | YES                                                       | 149226993   | p.R211X        | c.631C>T         |
| A                          | <i>XPA</i>         | 228                     | XP                     | YES                                                       | 104894132   | p.R228X        | c.682C>T         |
| A                          | <i>XPA</i>         | 244                     | XP                     | YES                                                       | 104894132   | p.H244R        | c.731A>G         |
| B                          | <i>XPB (ERCC3)</i> | 425                     | XP                     | YES                                                       | 121913047   | p.R425X        | c.1273C>T        |
| B                          | <i>XPB (ERCC3)</i> | 545                     | XP/CS                  | YES                                                       | 121913048   | p.Q545X        | c.1633C>T        |
| C                          | <i>XPC</i>         | 1                       | XP                     | NO                                                        | 760324503   | p.M1R          | c.2T>G           |
| C                          | <i>XPC</i>         | 52                      | XP                     | NO                                                        | n/a         | p.S52X         | c.155C>G         |
| C                          | <i>XPC</i>         | 149                     | XP                     | NO                                                        | n/a         | p.E149X        | c.445G>T         |
| C                          | <i>XPC</i>         | 155                     | XP                     | YES                                                       | 755825264   | p.R155X        | c.463C>T         |
| C                          | <i>XPC</i>         | 183                     | XP                     | NO                                                        | n/a         | p.K183X        | c.547A>T         |
| C                          | <i>XPC</i>         | 220                     | XP                     | YES                                                       | 745679643   | p.R220X        | c.658C>T         |
| C                          | <i>XPC</i>         | 247                     | XP                     | YES                                                       | 764321665   | p.R247X        | c.739C>T         |
| C                          | <i>XPC</i>         | 260                     | XP                     | NO                                                        | n/a         | p.W260X        | c.780G>A         |
| C                          | <i>XPC</i>         | 284                     | XP                     | NO                                                        | n/a         | p.E284X        | c. 850G>T        |
| C                          | <i>XPC</i>         | 293                     | XP                     | YES                                                       | 373519125   | p.R293X        | c. 877C>T        |
| C                          | <i>XPC</i>         | 320                     | XP                     | NO                                                        | n/a         | p.Q320X        | c. 958C>T        |
| C                          | <i>XPC</i>         | 334                     | XP                     | YES                                                       | 74737358    | p.P334H        | c.1001C>A        |
| C                          | <i>XPC</i>         | 341                     | XP                     | NO                                                        | n/a         | p.A341S        | c. 1021G>T       |
| C                          | <i>XPC</i>         | 415                     | XP                     | YES                                                       | 757958943   | p.R415X        | c.1243C>T        |
| C                          | <i>XPC</i>         | 467                     | XP                     | NO                                                        | n/a         | p.Q467X        | c.1399C>T        |
| C                          | <i>XPC</i>         | 522                     | XP                     | YES                                                       | 746250060   | p.K522X        | c.1564A>T        |
| C                          | <i>XPC</i>         | 554                     | XP                     | NO                                                        | n/a         | p.Q554X        | c.1660C>T        |
| C                          | <i>XPC</i>         | 559                     | XP                     | YES                                                       | 767569346   | p.Y559X        | c.1677C>G        |
| C                          | <i>XPC</i>         | 568                     | XP                     | NO                                                        | n/a         | p.Y568X        | c.1704T>A        |
| C                          | <i>XPC</i>         | 579                     | XP                     | YES                                                       | 121965088   | p.R579X        | c.1735C>T        |
| C                          | <i>XPC</i>         | 585                     | XP                     | YES                                                       | 749681216   | p.Y585C        | c. 1754A>G       |
| C                          | <i>XPC</i>         | 603                     | XP                     | YES                                                       | 767209381   | p. W603X       | c. 1808G>A       |
| C                          | <i>XPC</i>         | 690                     | XP                     | NO                                                        | n/a         | p.W690S        | c.2069G>C        |
| C                          | <i>XPC</i>         | 692                     | XP                     | YES                                                       | 374117852   | p.K692X        | c.2074A>T        |
| C                          | <i>XPC</i>         | 703                     | XP                     | NO                                                        | n/a         | p.P703L        | c.2108C>T        |
| C                          | <i>XPC</i>         | 718                     | XP                     | NO                                                        | 754775337   | p.R718X        | c.2152C>T        |
| C                          | <i>XPC</i>         | 738                     | XP                     | NO                                                        | n/a         | p.T738A        | c.2212A>G        |
| D                          | <i>XPB (ERCC2)</i> | 47                      | XP                     | NO                                                        | n/a         | p. G47R        | c.139 G>A        |
| D                          | <i>XPB (ERCC2)</i> | 51                      | XP                     | NO                                                        | n/a         | p.S51F         | c.152C>T         |
| D                          | <i>XPB (ERCC2)</i> | 76                      | XP                     | NO                                                        | n/a         | p. T76A        | c.226A>G         |
| D                          | <i>XPB (ERCC2)</i> | 234                     | XP                     | YES                                                       | n/a         | p.D234N        | c.700G>A         |
| D                          | <i>XPB (ERCC2)</i> | 292                     | XP                     | NO                                                        | n/a         | p.L292P        | c.T953C(T23532C) |
| D                          | <i>XPB (ERCC2)</i> | 368                     | XP                     | NO                                                        | n/a         | p.Q368X        | c.1102C>T        |

|   |             |     |               |     |           |                             |            |
|---|-------------|-----|---------------|-----|-----------|-----------------------------|------------|
| D | XPD (ERCC2) | 452 | XP            | YES | 199643821 | p.Q452X                     | c.1354C>T  |
| D | XPD (ERCC2) | 485 | XP            | NO  | 121913025 | p.L485P                     | c.1454 T>C |
| D | XPD (ERCC2) | 511 | XP            | NO  | 772572683 | p.R511Q                     | c.1532G>A  |
| D | XPD (ERCC2) | 541 | XP            | YES | 121913019 | p.S541R                     | c.1621A>C  |
| D | XPD (ERCC2) | 542 | XP            | NO  | n/a       | p.Y542C                     | c.1625A>G  |
| D | XPD (ERCC2) | 595 | XP            | NO  | n/a       | p.I595S                     | c.1784T>G  |
| D | XPD (ERCC2) | 601 | XP            | YES | 140522180 | p.R601L                     | c.1802G>T  |
| D | XPD (ERCC2) | 601 | XP            | YES | 753641926 | p.R601W                     | c.1801C>T  |
| D | XPD (ERCC2) | 602 | XP            | YES | 771824813 | p.G602D                     | c.1805G>A  |
| D | XPD (ERCC2) | 611 | XP            | NO  | n/a       | p.G611R                     | n/a        |
| D | XPD (ERCC2) | 616 | XP/CS         | NO  | n/a       | p.R616G                     | c.1846C>G  |
| D | XPD (ERCC2) | 616 | XP            | YES | 121913024 | p.R616W                     | c.1846C>T  |
| D | XPD (ERCC2) | 638 | XP            | NO  | n/a       | p.R638Q                     | n/a        |
| D | XPD (ERCC2) | 666 | XP            | YES | 752510317 | p.R666W                     | c.1996C>T  |
| D | XPD (ERCC2) | 675 | XP            | NO  | n/a       | p.G675R                     | c.2023G>C  |
| D | XPD (ERCC2) | 683 | XP            | YES | 41556519  | p.R683W                     | c.2047C>T  |
| D | XPD (ERCC2) | 683 | XP            | YES | 758439420 | p.R683Q                     | c.2048G>A  |
| D | XPD (ERCC2) | 726 | XP            | NO  | 121913017 | p.Q726X                     | c.2176C>T  |
| D | XPD (ERCC2) | 681 | TTD or XP     | YES | 121913023 | p.D681N                     | c.2041G>A  |
| D | XPD (ERCC2) | 378 | TTD or XP     | YES | 200043231 | p.R378H                     | c.1133G>A  |
| D | XPD (ERCC2) | 616 | TTD or XP     | YES | 376556895 | p.R616P                     | c.1847G>C  |
| D | XPD (ERCC2) | 662 | TTD or XP     | YES | 778479250 | p.Q662X                     | c.1984 C>T |
| D | XPD (ERCC2) | 681 | TTD, XP or CS | NO  | n/a       | p.D681H                     | c.2041G>C  |
| D | XPD (ERCC2) | 461 | XP or TTD     | YES | 121913016 | p.L461V plus p.V716-R730del | c.1381 C>G |
| D | XPD (ERCC2) | 112 | XP or TTD     | YES | 121913020 | p.R112H                     | c.335G>A   |
| D | XPD (ERCC2) | 259 | XP or TTD     | YES | 370454709 | p.C259Y                     | c.776G>A   |
| E | XPE (DDB2)  | 54  | XP            | NO  | n/a       | p.W54*                      | c.161G>A   |
| E | XPE (DDB2)  | 192 | XP            | NO  | 199822504 | p.R192X                     | c.574C>T   |
| E | XPE (DDB2)  | 239 | XP            | NO  | n/a       | p.R239I                     | c.716G>T   |
| E | XPE (DDB2)  | 244 | XP            | NO  | 121434639 | p.K244E                     | c.730A>G   |
| E | XPE (DDB2)  | 273 | XP            | NO  | 121434640 | p.R273H                     | c.818G>A   |
| E | XPE (DDB2)  | 305 | XP            | NO  | 886048361 | p.T305N                     | c.914C>A   |
| E | XPE (DDB2)  | 307 | XP            | NO  | 121434642 | p.D307Y                     | c.919G>T   |
| E | XPE (DDB2)  | 313 | XP            | NO  | 121434641 | p.R313X                     | c.937C>T   |
| E | XPE (DDB2)  | 350 | XP            | NO  | n/a       | p.L350P                     | c.1049T>C  |
| E | XPE (DDB2)  | 357 | XP            | NO  | 780665825 | p.P357L                     | c.1070C>T  |
| F | XPF (ERCC4) | 225 | XP            | YES | 764731249 | p.I225M                     | c.675A>G   |
| F | XPF (ERCC4) | 379 | XP            | YES | 1799802   | p.P379S                     | c.1135C>T  |
| F | XPF (ERCC4) | 454 | XP            | NO  | n/a       | p.R454W                     | c.1360A>T  |
| F | XPF (ERCC4) | 490 | XP            | NO  | 912480692 | p.R490Q                     | c.1469G>A  |
| F | XPF (ERCC4) | 502 | XP            | NO  | n/a       | p.E502K                     | c.1504G>A  |
| F | XPF (ERCC4) | 513 | XP            | YES | 769679311 | p.G513R                     | c.1537G>A  |
| F | XPF (ERCC4) | 529 | XP            | NO  | n/a       | p.I529T                     | c.1586T>C  |
| F | XPF (ERCC4) | 567 | XP            | NO  | n/a       | p.T567A                     | c.1699A>G  |
| F | XPF (ERCC4) | 589 | XP            | YES | 147105770 | p.R589W                     | c.1765C>T  |
| F | XPF (ERCC4) | 608 | XP            | NO  | n/a       | p.L608P                     | c.1823T>C  |
| F | XPF (ERCC4) | 611 | XP            | YES | 749814308 | p.G611R                     | c.1831G>A  |
| F | XPF (ERCC4) | 799 | XP            | YES | 121913049 | p.R799W                     | c.2395C>T  |
| G | XPG (ERCC5) | 2   | XP            | NO  | n/a       | p.G2W                       | c.4G>T     |
| G | XPG (ERCC5) | 11  | XP            | NO  | n/a       | p.E11X                      | c.31G>T    |
| G | XPG (ERCC5) | 16  | XP            | NO  | n/a       | p.Q16X                      | c.46C>T    |
| G | XPG (ERCC5) | 28  | XP            | NO  | 267607281 | p.A28D                      | c.83C>A    |
| G | XPG (ERCC5) | 37  | XP            | NO  | 761470006 | p.Q37X                      | c.109C>T   |
| G | XPG (ERCC5) | 65  | XP            | NO  | n/a       | p.L65P                      | c.194T>C   |
| G | XPG (ERCC5) | 72  | XP            | NO  | 121434574 | p.P72H                      | c.215C>A   |
| G | XPG (ERCC5) | 136 | XP            | NO  | 121434577 | p.Q136X                     | c.406C>T   |
| G | XPG (ERCC5) | 150 | XP            | NO  | n/a       | p.Q150X                     | c.448C>T   |
| G | XPG (ERCC5) | 176 | XP            | NO  | 121434573 | p.Q176X                     | c.526C>T   |
| G | XPG (ERCC5) | 263 | XP            | YES | 121434572 | p.R263X                     | c.787C>T   |
| G | XPG (ERCC5) | 290 | XP            | NO  | n/a       | p.I290N                     | c.869T>A   |
| G | XPG (ERCC5) | 585 | XP            | NO  | n/a       | p.E585X                     | c.1753G>T  |

|         |                    |     |       |     |           |         |           |
|---------|--------------------|-----|-------|-----|-----------|---------|-----------|
| G       | <i>XPG (ERCC5)</i> | 727 | XP    | NO  | n/a       | p.E727X | c.2179G>T |
| G       | <i>XPG (ERCC5)</i> | 778 | XP    | YES | 929424117 | p.L778P | c.2333T>C |
| G       | <i>XPG (ERCC5)</i> | 792 | XP    | YES | 121434571 | p.A792V | c.2375C>T |
| G       | <i>XPG (ERCC5)</i> | 795 | XP    | YES | 751772171 | p.A795T | c.2383G>A |
| G       | <i>XPG (ERCC5)</i> | 818 | XP    | YES | 774078839 | p.A818V | c.2453C>T |
| G       | <i>XPG (ERCC5)</i> | 858 | XP    | NO  | 121434575 | p.L858P | c.2573T>C |
| G       | <i>XPG (ERCC5)</i> | 874 | XP    | YES | 121434576 | p.A874T | c.2620G>A |
| G       | <i>XPG (ERCC5)</i> | 960 | XP    | YES | 121434570 | p.E960X | c.2878G>T |
| G       | <i>XPG (ERCC5)</i> | 968 | XP    | NO  | 267607280 | p.W968C | c.2904G>C |
| G       | <i>XPG (ERCC5)</i> | 138 | XP/CS | YES | 188898060 | p.R138X | c.412C>T  |
| G       | <i>XPG (ERCC5)</i> | 798 | XP/CS | NO  | n/a       | p.D798Y | c.2392G>T |
| G       | <i>XPG (ERCC5)</i> | 805 | XP/CS | YES | 899478069 | p.G805R | c.2413G>A |
| G       | <i>XPG (ERCC5)</i> | 814 | XP/CS | NO  | n/a       | p.W814S | c.2441G>C |
| variant | <i>POLH</i>        | 9   | XP    | YES | 781288440 | p.V9F   | c.25G>T   |
| variant | <i>POLH</i>        | 23  | XP    | NO  | n/a       | p.Q23X  | c.67C>T   |
| variant | <i>POLH</i>        | 111 | XP    | YES | 758423288 | p.R111H | c.332G>A  |
| variant | <i>POLH</i>        | 117 | XP    | NO  | n/a       | p.A117P | c.349G>C  |
| variant | <i>POLH</i>        | 122 | XP    | NO  | n/a       | p.T122P | c.364A>C  |
| variant | <i>POLH</i>        | 126 | XP    | YES | 121908563 | p.Q126X | c.376C>T  |
| variant | <i>POLH</i>        | 152 | XP    | NO  | n/a       | p.Q152X | c.454C>T  |
| variant | <i>POLH</i>        | 167 | XP    | NO  | n/a       | p.R167X | c.499C>T  |
| variant | <i>POLH</i>        | 174 | XP    | NO  | n/a       | p.W174C | c.522G>T  |
| variant | <i>POLH</i>        | 174 | XP    | NO  | n/a       | p.W174X | c.521G>A  |
| variant | <i>POLH</i>        | 220 | XP    | YES | n/a       | p.K220E | c.658A>G  |
| variant | <i>POLH</i>        | 228 | XP    | NO  | n/a       | p.G228X | c.682G>T  |
| variant | <i>POLH</i>        | 242 | XP    | YES | 745778317 | p.S242X | c.725C>G  |
| variant | <i>POLH</i>        | 263 | XP    | YES | n/a       | p.G263V | c.788G>T  |
| variant | <i>POLH</i>        | 264 | XP    | YES | 778739941 | p.A264P | c.790G>C  |
| variant | <i>POLH</i>        | 266 | XP    | NO  | n/a       | p.V266D | c.797T>A  |
| variant | <i>POLH</i>        | 295 | XP    | NO  | n/a       | p.G295R | c.883G>A  |
| variant | <i>POLH</i>        | 297 | XP    | NO  | n/a       | p.W297X | c.890G>A  |
| variant | <i>POLH</i>        | 299 | XP    | YES | 190423114 | p.Y299X | c.897T>G  |
| variant | <i>POLH</i>        | 303 | XP    | YES | 759607901 | p.R303X | c.907C>T  |
| variant | <i>POLH</i>        | 306 | XP    | NO  | 121908562 | p.E306X | c.916G>T  |
| variant | <i>POLH</i>        | 356 | XP    | YES | 559497462 | p.R356X | c.1066C>T |
| variant | <i>POLH</i>        | 361 | XP    | NO  | n/a       | p.R361S | c.1083G>T |
| variant | <i>POLH</i>        | 373 | XP    | YES | 121908564 | p.Q373X | c.1117C>T |
| variant | <i>POLH</i>        | 482 | XP    | NO  | n/a       | p.S482X | c.1445C>A |
| variant | <i>POLH</i>        | 521 | XP    | NO  | n/a       | p.Q521X | c.1561C>T |
| variant | <i>POLH</i>        | 535 | XP    | YES | 56307355  | p.K535E | c.1603A>G |
| variant | <i>POLH</i>        | 548 | XP    | NO  | n/a       | p.S548X | c.1643C>A |
| variant | <i>POLH</i>        | 589 | XP    | YES | 121908565 | p.K589T | c.1766A>C |
| variant | <i>POLH</i>        | 692 | XP    | YES | 199562456 | p.T692A | c.2074A>G |
| variant | <i>POLH</i>        | 714 | XP    | NO  | n/a       | p.X714W | c.2141A>G |

\*XP- xeroderma pigmentosum; TTD - trichothiodystrophy; CS - Cockayne syndrome; XP/CS xeroderma pigmentosum - Cockayne syndrome complex

\*\*from dbSNP

\*\*\*none reported

**eTable 2.** 65 XP Mutations Listed in gnomAD Database

| Complementati<br>on<br>Group | Gene        | Amino<br>Acid<br>Num-<br>ber | Clinical<br>Pheno-<br>type* | Protein<br>Change           | cDNA       | rs<br>Number** | Allele Count<br>gnomAD | Number of<br>Homozygotes<br>gnomAD | Total Alleles<br>Sequenced<br>gnomAD | gnomAD<br>Allele<br>Frequency<br>(q) | Sum (q)<br>for Each<br>Gene | Estimated<br>Frequency of<br>Homozygous<br>Affected Individ-<br>uals in gnomAD<br>(q <sup>2</sup> ) | Sum (q <sup>2</sup> ) of<br>Each Gene |
|------------------------------|-------------|------------------------------|-----------------------------|-----------------------------|------------|----------------|------------------------|------------------------------------|--------------------------------------|--------------------------------------|-----------------------------|-----------------------------------------------------------------------------------------------------|---------------------------------------|
| A                            | XPA         | 108                          | XP                          | p.C108F                     | c.323G>T   | n/a***         | 1                      | 0                                  | 245202                               | 4.08E-06                             |                             | 1.66E-11                                                                                            |                                       |
| A                            | XPA         | 111                          | XP                          | p.E111X                     | c.331G>T   | n/a            | 5                      | 0                                  | 276416                               | 1.81E-05                             |                             | 3.27E-10                                                                                            |                                       |
| A                            | XPA         | 207                          | XP                          | p.R207X                     | c.619C>T   | 104894133      | 6                      | 0                                  | 245910                               | 2.44E-05                             |                             | 5.95E-10                                                                                            |                                       |
| A                            | XPA         | 211                          | XP                          | p.R211X                     | c.631C>T   | 149226993      | 1                      | 0                                  | 245906                               | 4.07E-06                             |                             | 1.65E-11                                                                                            |                                       |
| A                            | XPA         | 228                          | XP                          | p.R228X                     | c.682C>T   | 104894132      | 95                     | 0                                  | 276474                               | 3.44E-04                             |                             | 1.18E-07                                                                                            |                                       |
| A                            | XPA         | 244                          | XP                          | p.H244R                     | c.731A>G   | 104894132      | 38                     | 0                                  | 276984                               | 1.38E-04                             | 0.053%                      | 1.91E-08                                                                                            | 1.38E-07                              |
| B                            | XPB (ERCC3) | 425                          | XP                          | p.R425X                     | c.1273C>T  | 121913047      | 2                      | 0                                  | 246178                               | 8.12E-06                             |                             | 6.60E-11                                                                                            |                                       |
| B                            | XPB (ERCC3) | 545                          | XP/CS                       | p.Q545X                     | c.1633C>T  | 121913048      | 1                      | 0                                  | 246244                               | 4.06E-06                             | 0.001%                      | 1.65E-11                                                                                            | 8.25E-11                              |
| C                            | XPC         | 155                          | XP                          | p.R155X                     | c.463C>T   | 755825264      | 4                      | 0                                  | 246142                               | 1.63E-05                             |                             | 2.64E-10                                                                                            |                                       |
| C                            | XPC         | 220                          | XP                          | p.R220X                     | c.658C>T   | 745679643      | 6                      | 0                                  | 275118                               | 2.18E-05                             |                             | 4.76E-10                                                                                            |                                       |
| C                            | XPC         | 247                          | XP                          | p.R247X                     | c.739C>T   | 764321665      | 1                      | 0                                  | 30964                                | 3.23E-05                             |                             | 1.04E-09                                                                                            |                                       |
| C                            | XPC         | 293                          | XP                          | p.R293X                     | c.877C>T   | 373519125      | 4                      | 0                                  | 245672                               | 1.63E-05                             |                             | 2.65E-10                                                                                            |                                       |
| C                            | XPC         | 334                          | XP                          | p.P334H                     | c.1001C>A  | 74737358       | 838                    | 7                                  | 274914                               | 3.05E-03                             |                             | 9.29E-06                                                                                            |                                       |
| C                            | XPC         | 415                          | XP                          | p.R415X                     | c.1243C>T  | 757958943      | 3                      | 0                                  | 246190                               | 1.22E-05                             |                             | 1.49E-10                                                                                            |                                       |
| C                            | XPC         | 522                          | XP                          | p.K522X                     | c.1564A>T  | 746250060      | 1                      | 0                                  | 246248                               | 4.06E-06                             |                             | 1.65E-11                                                                                            |                                       |
| C                            | XPC         | 559                          | XP                          | p.Y559X                     | c.1677C>G  | 767569346      | 1                      | 0                                  | 246260                               | 4.06E-06                             |                             | 1.65E-11                                                                                            |                                       |
| C                            | XPC         | 579                          | XP                          | p.R579X                     | c.1735C>T  | 121965088      | 3                      | 0                                  | 246248                               | 1.22E-05                             |                             | 1.48E-10                                                                                            |                                       |
| C                            | XPC         | 585                          | XP                          | p.Y585X                     | c.1754A>G  | 749681216      | 1                      | 0                                  | 246248                               | 4.06E-06                             |                             | 1.65E-11                                                                                            |                                       |
| C                            | XPC         | 603                          | XP                          | p.W603X                     | c.1808G>A  | 767209381      | 2                      | 0                                  | 246090                               | 8.13E-06                             |                             | 6.60E-11                                                                                            |                                       |
| C                            | XPC         | 692                          | XP                          | p.K692X                     | c.2074A>T  | 374117852      | 3                      | 0                                  | 276036                               | 1.09E-05                             | 0.319%                      | 1.18E-10                                                                                            | 9.29E-06                              |
| D                            | XPD (ERCC2) | 234                          | XP                          | p.D234N                     | c.700G>A   | n/a            | 1                      | 0                                  | 245512                               | 4.07E-06                             |                             | 1.66E-11                                                                                            |                                       |
| D                            | XPD (ERCC2) | 541                          | XP                          | p.S541R                     | c.1621A>C  | 121913019      | 1                      | 0                                  | 246242                               | 4.06E-06                             |                             | 1.65E-11                                                                                            |                                       |
| D                            | XPD (ERCC2) | 601                          | XP                          | p.R601L                     | c.1802G>T  | 140522180      | 6                      | 0                                  | 276602                               | 2.17E-05                             |                             | 4.70E-10                                                                                            |                                       |
| D                            | XPD (ERCC2) | 601                          | XP                          | p.R601W                     | c.1801C>T  | 753641926      | 12                     | 0                                  | 276668                               | 4.34E-05                             |                             | 1.88E-09                                                                                            |                                       |
| D                            | XPD (ERCC2) | 602                          | XP                          | p.G602D                     | c.1805G>A  | 771824813      | 1                      | 0                                  | 245708                               | 4.07E-06                             |                             | 1.66E-11                                                                                            |                                       |
| D                            | XPD (ERCC2) | 616                          | XP                          | p.R616W                     | c.1846C>T  | 121913024      | 16                     | 0                                  | 276718                               | 5.78E-05                             |                             | 3.34E-09                                                                                            |                                       |
| D                            | XPD (ERCC2) | 666                          | XP                          | p.R666W                     | c.1996C>T  | 752510317      | 3                      | 0                                  | 246154                               | 1.22E-05                             |                             | 1.49E-10                                                                                            |                                       |
| D                            | XPD (ERCC2) | 683                          | XP                          | p.R683W                     | c.2047C>T  | 41556519       | 16                     | 0                                  | 276886                               | 5.78E-05                             |                             | 3.34E-09                                                                                            |                                       |
| D                            | XPD (ERCC2) | 683                          | XP                          | p.R683Q                     | c.2048G>A  | 758439420      | 4                      | 0                                  | 246000                               | 1.59E-05                             |                             | 2.52E-10                                                                                            |                                       |
| D                            | XPD (ERCC2) | 681                          | XP or TTD                   | p.D681N                     | c.2041G>A  | 121913023      | 5                      | 0                                  | 246130                               | 2.03E-05                             |                             | 4.12E-10                                                                                            |                                       |
| D                            | XPD (ERCC2) | 378                          | XP or TTD                   | p.R378H                     | c.1133G>A  | 200043231      | 3                      | 0                                  | 246128                               | 1.22E-05                             |                             | 1.49E-10                                                                                            |                                       |
| D                            | XPD (ERCC2) | 616                          | XP or TTD                   | p.R616P                     | c.1847G>C  | 376556895      | 38                     | 0                                  | 276686                               | 1.37E-04                             |                             | 1.89E-08                                                                                            |                                       |
| D                            | XPD (ERCC2) | 662                          | XP or TTD                   | p.Q662X                     | c.1984 C>T | 778479250      | 2                      | 0                                  | 277088                               | 7.22E-06                             |                             | 5.21E-11                                                                                            |                                       |
| D                            | XPD (ERCC2) | 461                          | XP or TTD                   | p.L461V plus p.V716-R730del | c.1381 C>G | 121913016      | 314                    | 2                                  | 276906                               | 1.13E-03                             |                             | 1.29E-06                                                                                            |                                       |
| D                            | XPD (ERCC2) | 112                          | XP or TTD                   | p.R112H                     | c.335G>A   | 121913020      | 6                      | 0                                  | 277006                               | 2.17E-05                             |                             | 4.69E-10                                                                                            |                                       |
| D                            | XPD (ERCC2) | 259                          | XP or TTD                   | p.C259Y                     | c.776G>A   | 370454709      | 18                     | 0                                  | 276676                               | 6.51E-05                             | 0.162%                      | 4.23E-09                                                                                            | 1.32E-06                              |
| F                            | XPF (ERCC4) | 225                          | XP                          | p.I225M                     | c.675A>G   | 764731249      | 1                      | 0                                  | 246128                               | 4.06E-06                             |                             | 1.65E-11                                                                                            |                                       |
| F                            | XPF (ERCC4) | 379                          | XP                          | p.P379S                     | c.1135C>T  | 1799802        | 1122                   | 4                                  | 276560                               | 4.05E-03                             |                             | 1.64E-05                                                                                            |                                       |
| F                            | XPF (ERCC4) | 513                          | XP                          | p.G513R                     | c.1537G>A  | 769679311      | 1                      | 0                                  | 246060                               | 4.06E-06                             |                             | 1.65E-11                                                                                            |                                       |
| F                            | XPF (ERCC4) | 589                          | XP                          | p.R589W                     | c.1765C>T  | 147105770      | 16                     | 0                                  | 274824                               | 5.82E-05                             |                             | 3.39E-09                                                                                            |                                       |
| F                            | XPF (ERCC4) | 611                          | XP                          | p.G611R                     | c.1831G>A  | 749814308      | 3                      | 0                                  | 277130                               | 1.08E-05                             |                             | 1.17E-10                                                                                            |                                       |
| F                            | XPF (ERCC4) | 799                          | XP                          | p.R799W                     | c.2395C>T  | 121913049      | 124                    | 0                                  | 277034                               | 4.48E-04                             | 0.457%                      | 2.00E-07                                                                                            | 1.66E-05                              |
| G                            | XPG (ERCC5) | 263                          | XP                          | p.R263X                     | c.787C>T   | 121434572      | 1                      | 0                                  | 246138                               | 4.06E-06                             |                             | 1.65E-11                                                                                            |                                       |

|               |                    |           |           |           |           |           |           |              |           |                |              |              |                 |                 |
|---------------|--------------------|-----------|-----------|-----------|-----------|-----------|-----------|--------------|-----------|----------------|--------------|--------------|-----------------|-----------------|
| G             | <i>XPG (ERCC5)</i> | 778       | XP        | p.L778P   | c.2333T>C | n/a       | 1         | 0            | 245310    | 4.08E-06       | 1.66E-11     |              |                 |                 |
| G             | <i>XPG (ERCC5)</i> | 792       | XP        | p.A792V   | c.2375C>T | 121434571 | 6         | 0            | 246078    | 2.44E-05       | 5.94E-10     |              |                 |                 |
| G             | <i>XPG (ERCC5)</i> | 795       | XP        | p.A795T   | c.2383G>A | 751772171 | 8         | 0            | 277096    | 2.89E-05       | 8.33E-10     |              |                 |                 |
| G             | <i>XPG (ERCC5)</i> | 818       | XP        | p.A818V   | c.2453C>T | 774078839 | 11        | 0            | 246172    | 4.47E-05       | 2.00E-09     |              |                 |                 |
| G             | <i>XPG (ERCC5)</i> | 874       | XP        | p.A874T   | c.2620G>A | 121434576 | 5         | 0            | 246258    | 2.03E-05       | 4.12E-10     |              |                 |                 |
| G             | <i>XPG (ERCC5)</i> | 960       | XP        | p.E960X   | c.2878G>T | 121434570 | 2         | 0            | 246116    | 8.13E-06       | 6.60E-11     |              |                 |                 |
| G             | <i>XPG (ERCC5)</i> | 138       | XP/CS     | p.R138X   | c.412C>T  | 188898060 | 2         | 0            | 246240    | 8.12E-06       | 6.60E-11     |              |                 |                 |
| G             | <i>XPG (ERCC5)</i> | 805       | XP/CS     | p.G805R   | c.2413G>A | n/a       | 3         | 0            | 246196    | 1.22E-05       | 0.015%       | 1.49E-10     | 4.15E-09        |                 |
| variant       | <i>POLH</i>        | 9         | XP        | p.V9F     | c.25G>T   | 781288440 | 17        | 0            | 277246    | 6.13E-05       |              | 3.76E-09     |                 |                 |
| variant       | <i>POLH</i>        | 111       | XP        | p.R111H   | c.332G>A  | 758423288 | 11        | 0            | 277250    | 3.97E-05       |              | 1.57E-09     |                 |                 |
| variant       | <i>POLH</i>        | 126       | XP        | p.Q126X   | c.376C>T  | 121908563 | 1         | 0            | 246262    | 4.06E-06       |              | 1.65E-11     |                 |                 |
| variant       | <i>POLH</i>        | 220       | XP        | p.K220E   | c.658A>G  | n/a       | 1         | 0            | 246218    | 4.06E-06       |              | 1.65E-11     |                 |                 |
| variant       | <i>POLH</i>        | 242       | XP        | p.S242X   | c.725C>G  | 745778317 | 2         | 0            | 246246    | 8.12E-06       |              | 6.60E-11     |                 |                 |
| variant       | <i>POLH</i>        | 263       | XP        | p.G263V   | c.788G>T  | n/a       | 1         | 0            | 246184    | 4.06E-06       |              | 1.65E-11     |                 |                 |
| variant       | <i>POLH</i>        | 264       | XP        | p.A264P   | c.790G>C  | 778739941 | 4         | 0            | 246176    | 1.63E-05       |              | 2.64E-10     |                 |                 |
| variant       | <i>POLH</i>        | 299       | XP        | p.Y299X   | c.897T>G  | 190423114 | 1         | 0            | 246218    | 4.06E-06       |              | 1.65E-11     |                 |                 |
| variant       | <i>POLH</i>        | 303       | XP        | p.R303X   | c.907C>T  | 759607901 | 3         | 0            | 246202    | 1.22E-05       |              | 1.49E-10     |                 |                 |
| variant       | <i>POLH</i>        | 356       | XP        | p.R356X   | c.1066C>T | 559497462 | 6         | 0            | 243794    | 2.46E-05       |              | 6.06E-10     |                 |                 |
| variant       | <i>POLH</i>        | 373       | XP        | p.Q373X   | c.1117C>T | 121908564 | 1         | 0            | 246148    | 4.06E-06       |              | 1.65E-11     |                 |                 |
| variant       | <i>POLH</i>        | 535       | XP        | p.K535E   | c.1603A>G | 56307355  | 234       | 3            | 276598    | 8.42E-04       |              | 7.10E-07     |                 |                 |
| variant       | <i>POLH</i>        | 589       | XP        | p.K589T   | c.1766A>C | 121908565 | 6         | 0            | 246216    | 2.44E-05       |              | 5.94E-10     |                 |                 |
| variant       | <i>POLH</i>        | 692       | XP        | p.T692A   | c.2074A>G | 199562456 | 42        | 0            | 276998    | 1.52E-04       | 0.120%       | 2.30E-08     | 7.40E-07        |                 |
| <b>TOTALS</b> |                    | <b>65</b> | <b>65</b> | <b>65</b> |           | <b>65</b> | <b>58</b> | <b>3,098</b> | <b>16</b> | <b>253,995</b> | <b>1.13%</b> | <b>1.13%</b> | <b>2.81E-05</b> | <b>2.81E-05</b> |

\*XP- xeroderma pigmentosum; TTD - trichothiodystrophy; CS - Cockayne syndrome; XP/CS xeroderma pigmentosum - Cockayne syndrome complex

\*\*from dbSNP

\*\*\*none reported
